# Supplementary material
Source: Springer Nature journal article supplement (https://www.springermedizin.de/resource/supplementary/13054_2013_2186_MOESM3_ESM.pdf/9712630)

**A**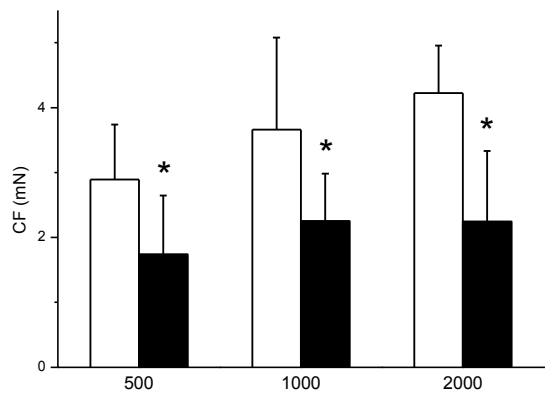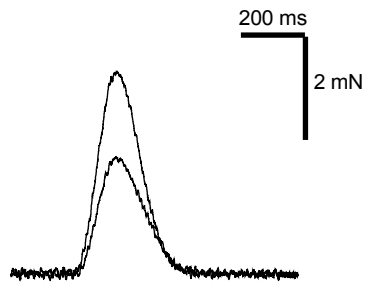**B**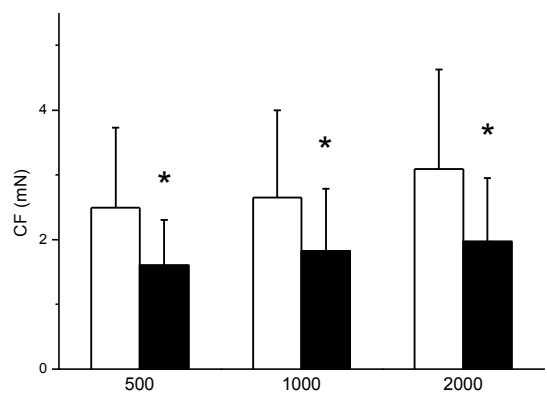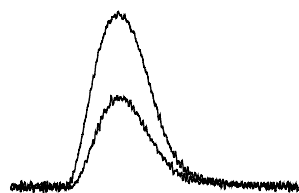**C**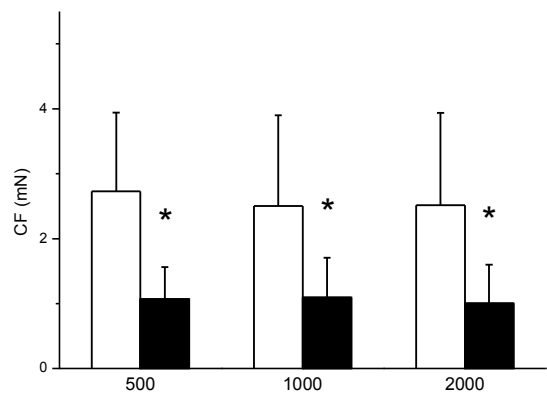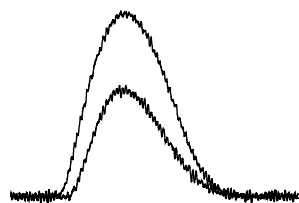

Supplement: MOESM3 [file 9712630]
